# Supplementary material
Source: PubMed Central journal article supplement (PMC6081507)

# Circumferential vs.

DSC

1 - Circumferential  
2 - Non deformed  
3 - Scaphocephaly  
4 - Anteroposterior  
5 - Toulouse

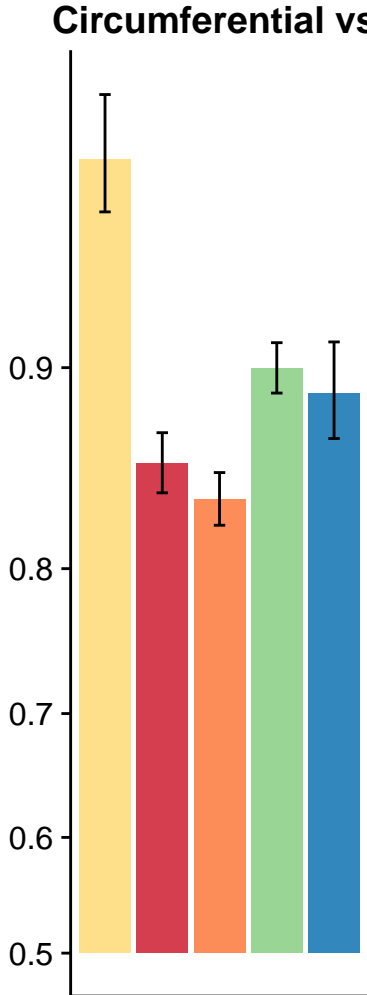

MAD

1 - Circumferential  
2 - Non deformed  
3 - Scaphocephaly  
4 - Anteroposterior  
5 - Toulouse

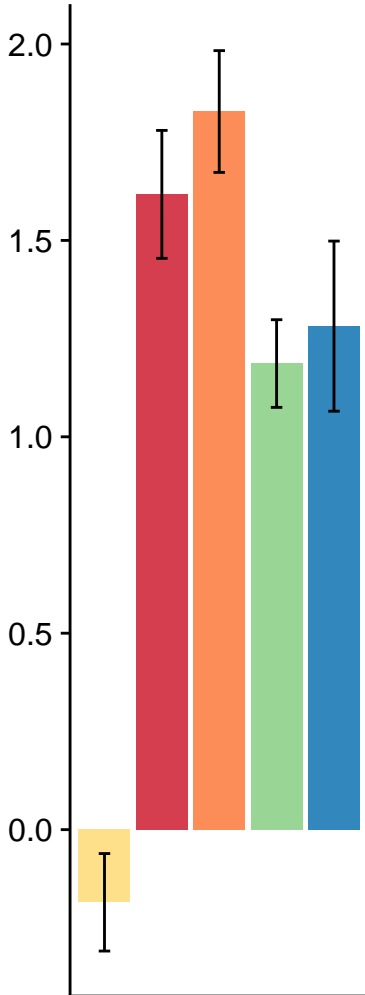

HD

1 - Circumferential  
2 - Non deformed  
3 - Scaphocephaly  
4 - Anteroposterior  
5 - Toulouse

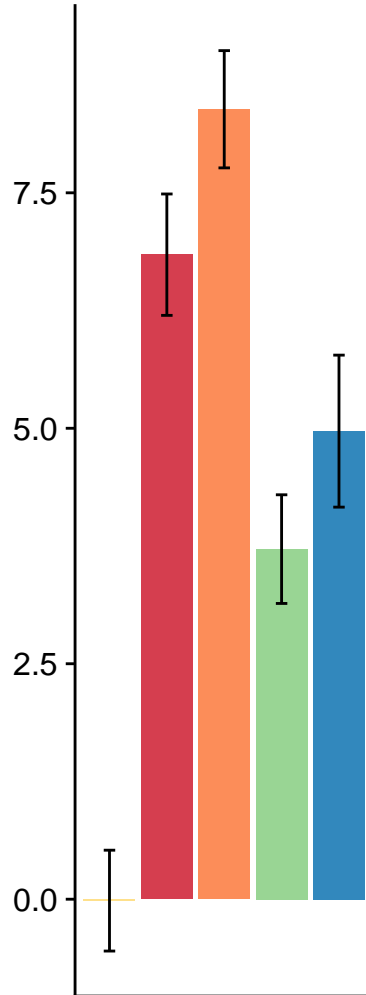

Supplement: JOA-233-302-s005.pdf [file JOA-233-302-s005.pdf]
