# Supplementary material
Source: PubMed Central journal article supplement (PMC6081507)

# Scaphocephaly vs.

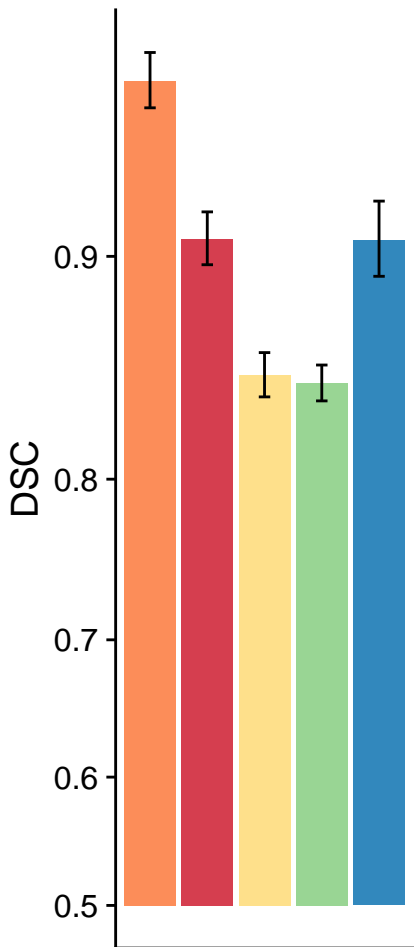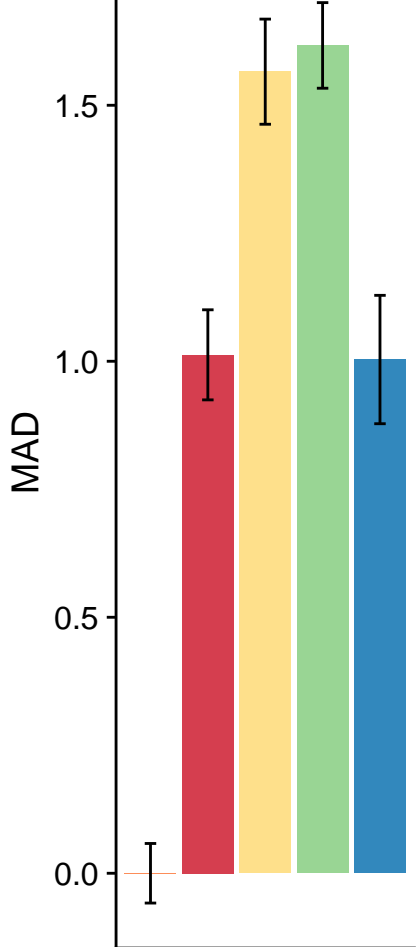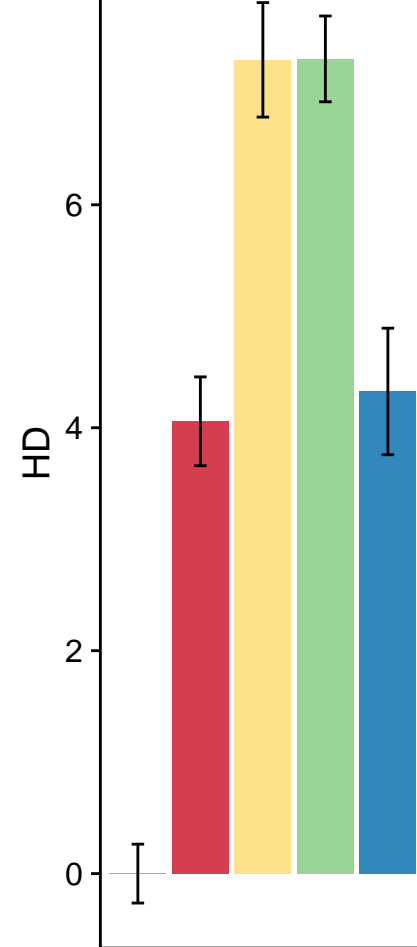

Supplement: JOA-233-302-s004.pdf [file JOA-233-302-s004.pdf]

# Anteroposterior vs.

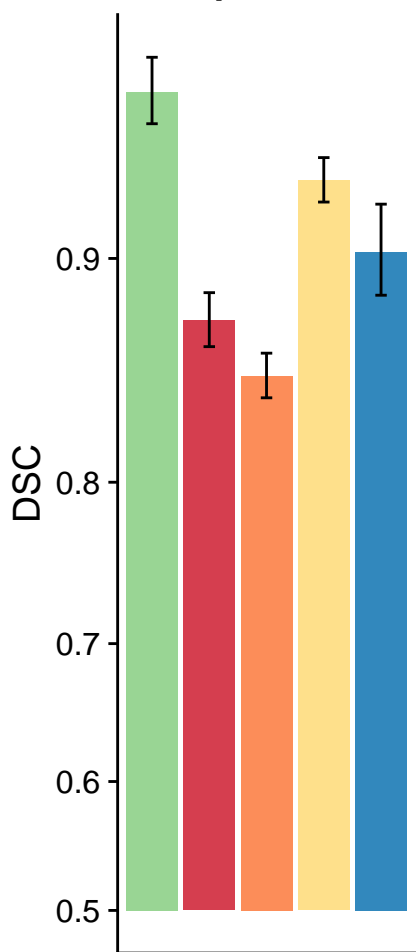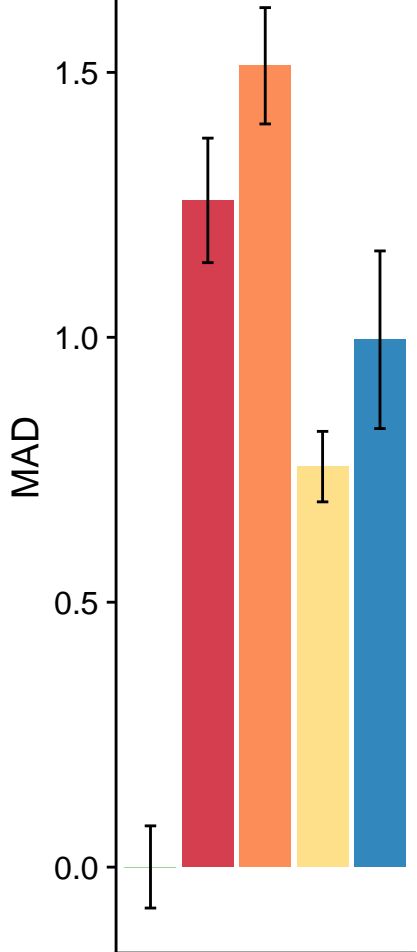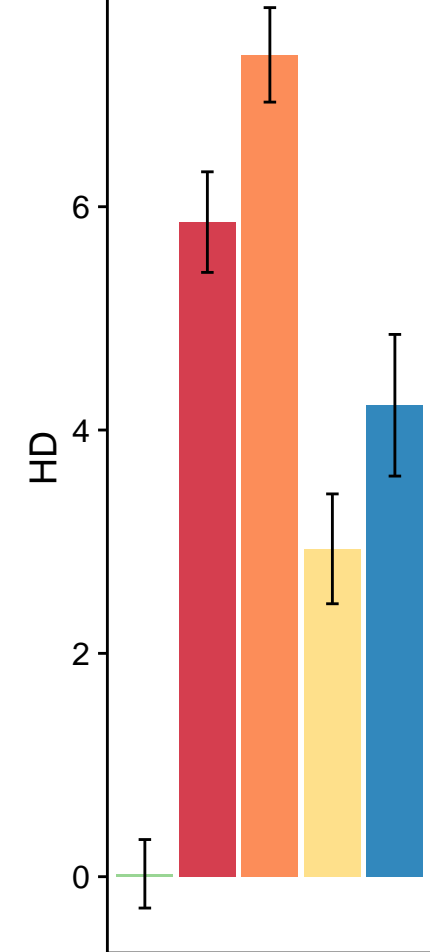

Supplement: JOA-233-302-s006.pdf [file JOA-233-302-s006.pdf]

# Toulouse vs.

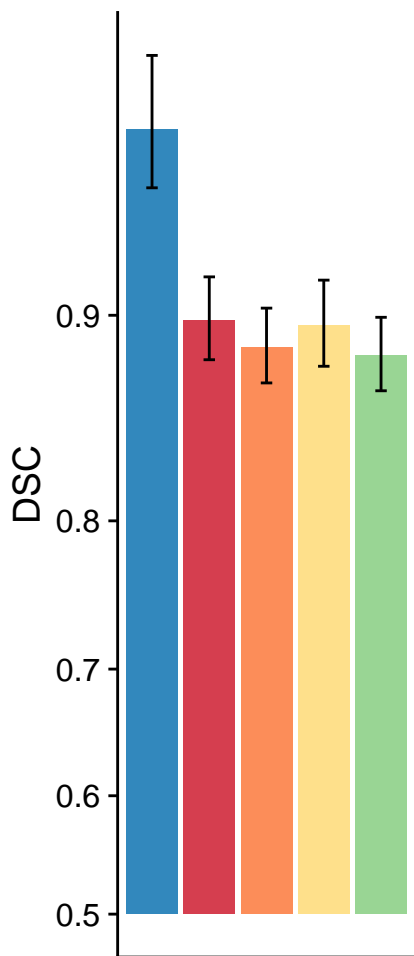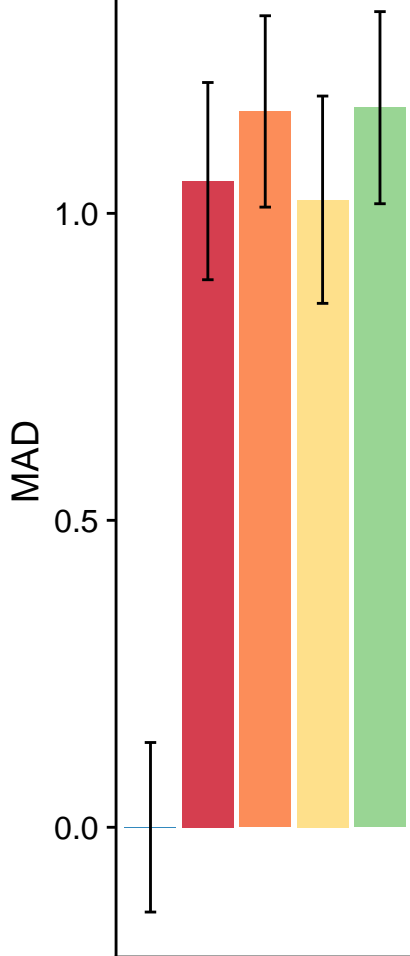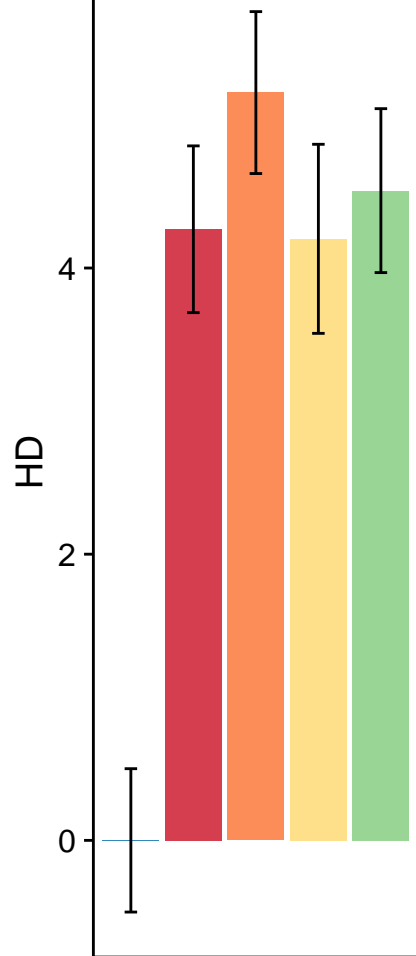

Supplement: JOA-233-302-s007.pdf [file JOA-233-302-s007.pdf]

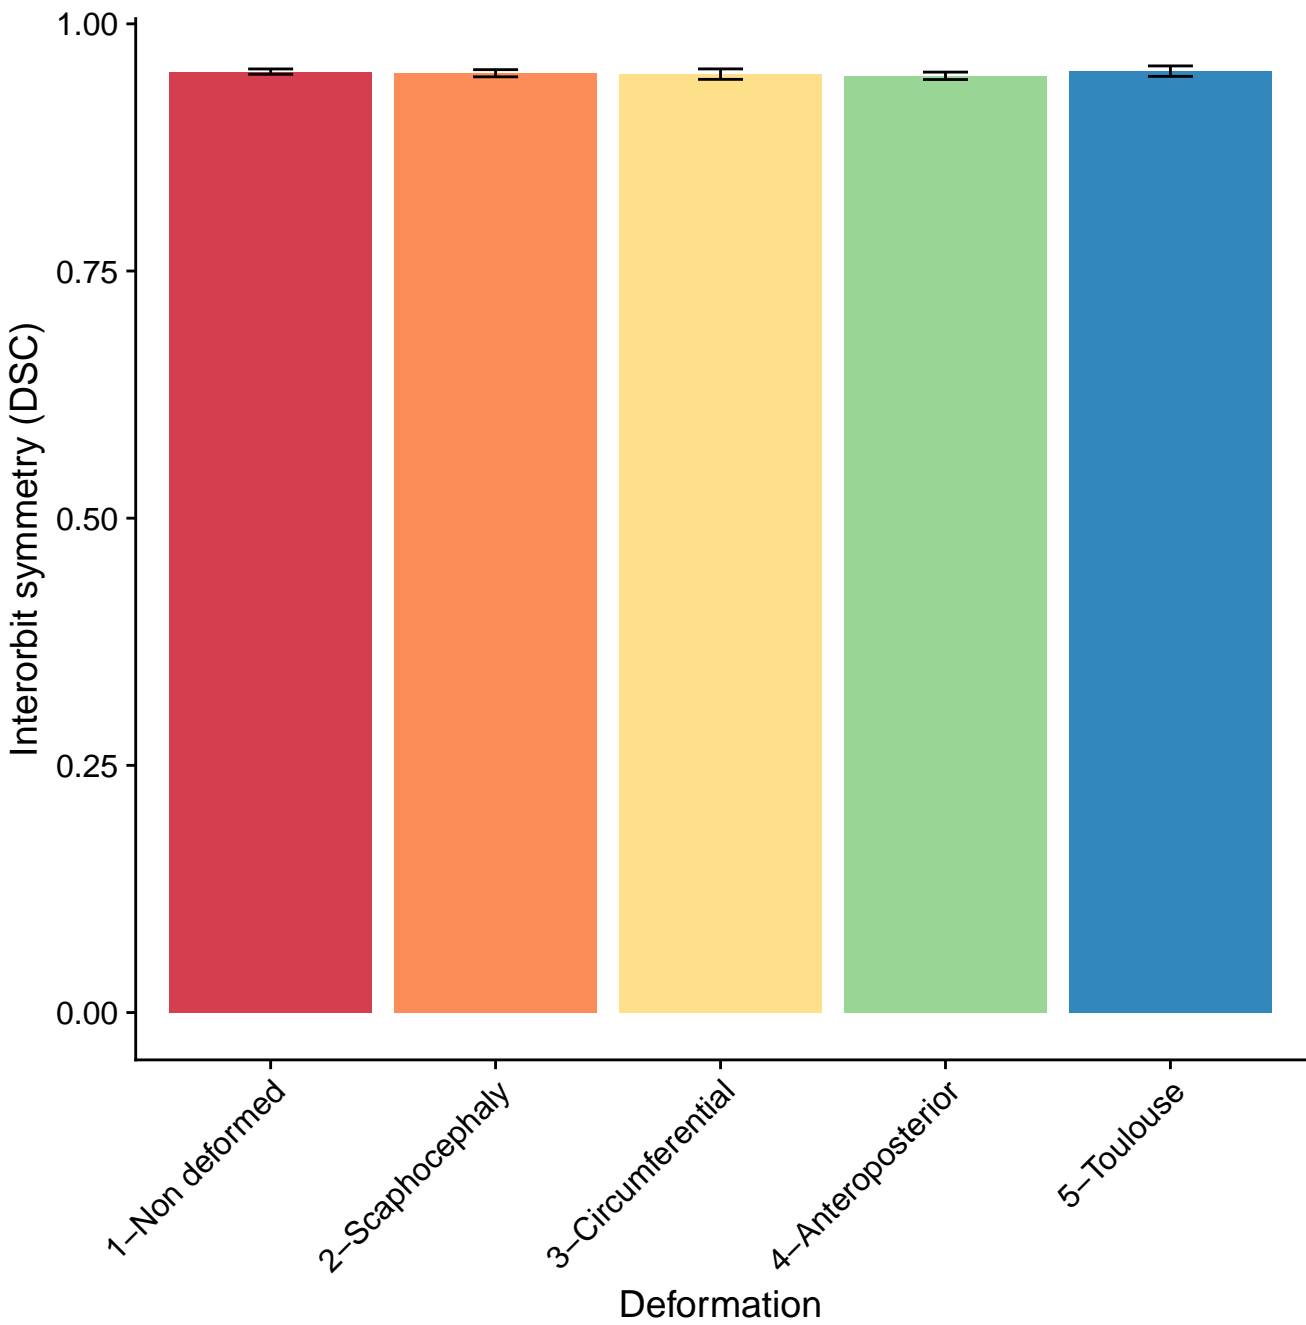

Supplement: JOA-233-302-s008.pdf [file JOA-233-302-s008.pdf]

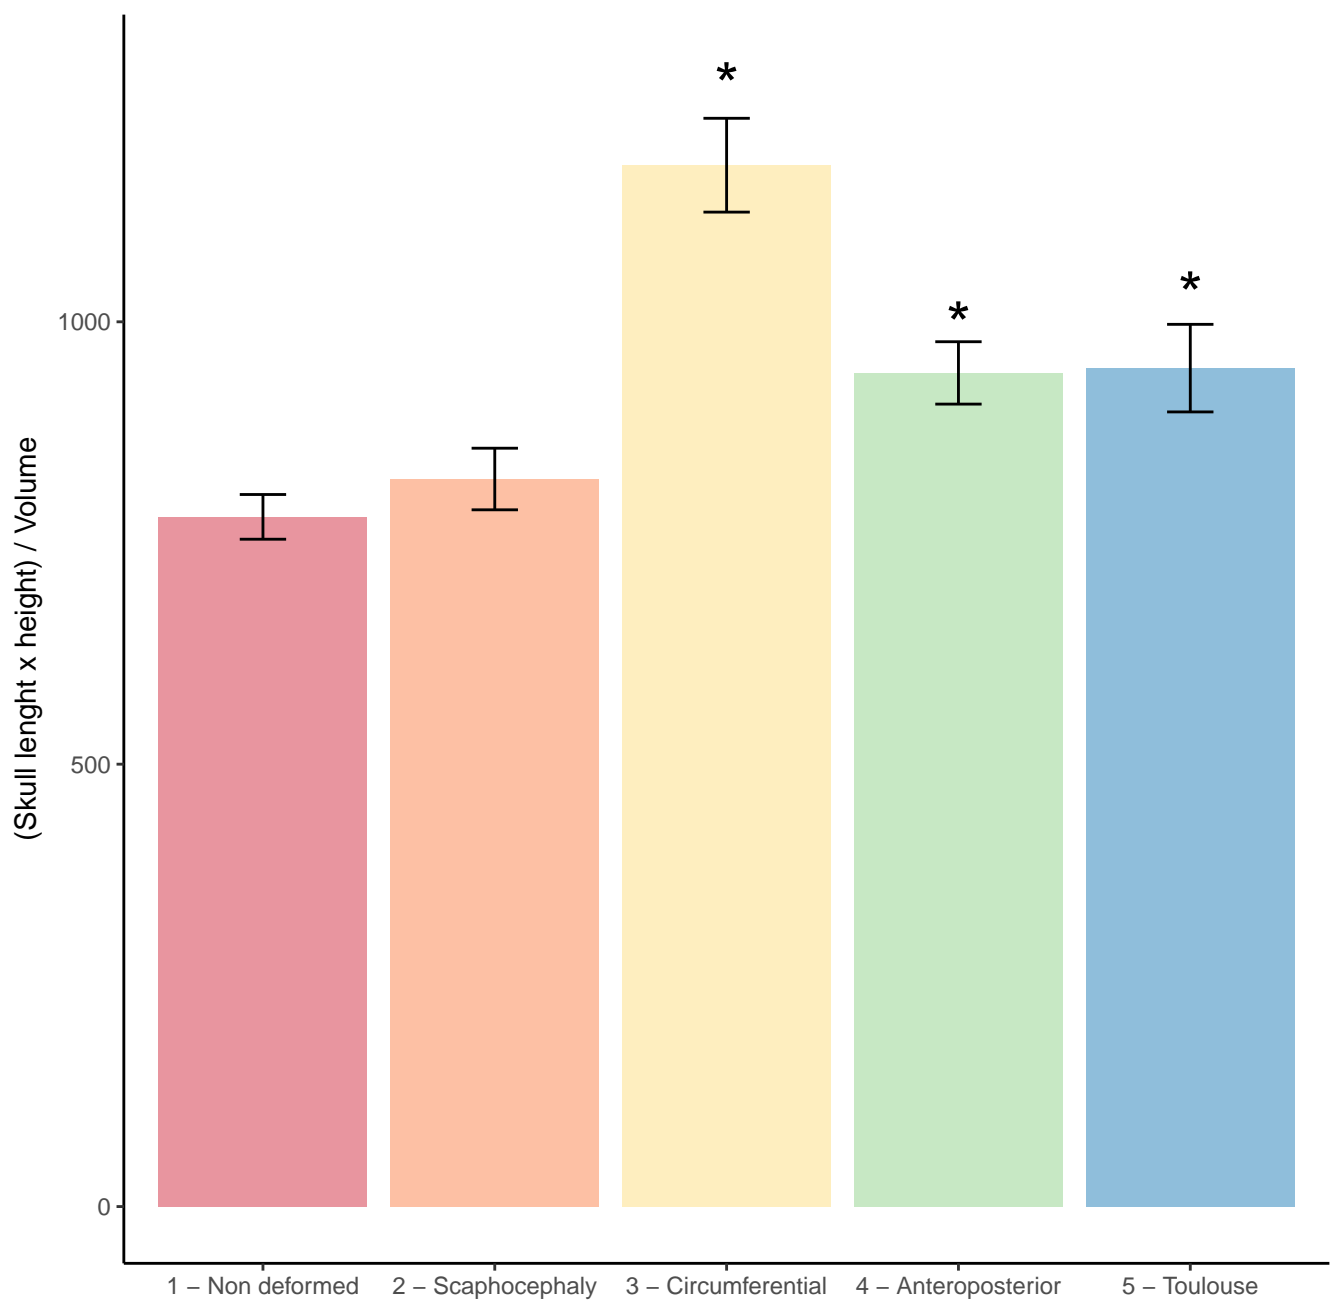

Supplement: JOA-233-302-s009.pdf [file JOA-233-302-s009.pdf]
